# Supplementary material
Source: HighWire-hosted journal article supplement (https://www.qdcxjkg.com/highwire/filestream/113561/field_highwire_adjunct_files/8/27_PartyCourt1943.pdf)
Supplement: 27_PartyCourt1943.pdf [file 27_PartyCourt1943.pdf]

Reference no. 27 of

Winkelmann A, Noack T: The Clara cell – a 'Third Reich eponym'? *Eur Respir J* 2010; 36: 722–727

Parteigericht [Party Court]: Decision I/199/42 Sa. 1943. *Archive*: Bundesarchiv, Berlin. *Signature*: BArch (former BDC), PK, Clara, Max, 12.12.1899.

**Short comment by the authors:**

Decision of the "Highest Party Court" of NSDAP regarding an appeal by Max Clara against an earlier decision by the District Party Court (*Gaugericht*) of Saxony. The District Court had convicted Clara on 28 September 1942 because of his opposition to the "*Gauleiter*" (District Leader) in an academic appointment procedure.

The text of the decision of the Highest Party Court repeats the main arguments of the earlier decision and the main reason for Clara's appeal, namely his obedience to another high-ranking NSDAP member, the "*Reichsdozentenführer*" (leader of all lecturers of the Reich), Prof. Schultze. The Highest Party Court accepted this appeal and mitigated the sentence to "*strenger Verweis*" (severe reprimand). "*Verweis*" was the lowest of possible sentences of NSDAP party courts.

# IM NAMEN DES FÜHRERS

Geschäfts-Nr. I/199/42 Sa.

In Sachen des Pg. Prof. Dr. med. Max Clara, München,  
Pattenkofferstrasse 13

Mitglieds-Nummer 3 610 105 hat die I. Kammer des Obersten  
Parteigerichtes der NSDAP. auf die am 28. 12. 1942 eingegangene  
Beschwerde des Angeschuldigten vom 23. 12. 1942  
gegen das Urteil des Gaugerichtes Sachsen vom 28. 9. 1942

in der Sitzung vom 19. 2. 1943 unter Mitwirkung  
des Vorsitzenden Pg. Dr. Volkman n  
und der Richter Pg. Lusebrink

Pg. Kriele

Pg. -----

Pg. -----

geb. 12.2.89

für Recht erkannt:

Dem Angeschuldigten wird ein strenger Verweis erteilt.

Q<sub>n</sub>

B e g r ü n d u n g :

Das Gaugericht Sachsen hat mit Urteil vom 28. 9. 1942 dem Ange- schuldigten wegen disziplinelosen und parteischädigenden Verhal- tens eine Verwarnung erteilt. Gegen dieses ihm am 7. 10. 1942 zugestellte Urteil hat der Angeeschuldigte mit Schreiben vom 23. 12. 1942 Beschwerde eingelegt. Er hat die Fristversümmis da - mit entschuldigt, dass er sich zur Zeit der Zustellung des Ur - teils in der Übersiedlung von Leipzig nach München befunden habe und sich deshalb um die Angelegenheit nicht so intensiv, wie es notwendig gewesen wäre, habe kümmern können. Erst jetzt habe er entgegen den früheren Auskünften alter Parteigenossen erfahren, dass die ihm erteilte Verwarnung eine schwere Strafe darstelle.

Mit Rücksicht darauf, dass die Beschwerde des Angeeschuldigten in sachlicher Hinsicht teilweise begründet ist, hat das Oberste Parteigericht die Entschuldigung gelten lassen.

Der am ~~12. 2. 1889~~ geborene Angeeschuldigte gehörte bis Ende Sep- tember 1942 als ordentlicher Professor der medizinischen Fakul- tät der Universität Leipzig an und ist mit Wirkung vom 1.10.42 an die Universität München berufen worden. Seit dem 1.4.1935 ist der Angeeschuldigte Mitglied der NSDAP. An der Universität und Handelshochschule Leipzig übte er seit 1936 das Amt des örtlichen Dozentenführers aus. Im Dezember 1941 wurde er vom Gauleiter von Sachsen mit der kommissarischen Leitung der Gau- dozentenführung Sachsen beauftragt, wodurch er den Rang eines Gauamtsleiters erhielt.

Als Gaudozentenführer war der Angeeschuldigte berechtigt, an Sitzungen aller Fakultäten teilzunehmen, und befugt, im Einver- nehmen mit der Reichsdozentenführung politische Beurteilungen

in allen Hochschulangelegenheiten Personalfragen betreffend abzugeben; disziplinar unterstand er dem Gauleiter.

Im Laufe des Jahres 1942 wurde infolge des Ausscheidens eines Professors der Lehrstuhl für Ohrenheilkunde an der Universität Leipzig frei. Bereits im Jahre 1936 hatte sich im Einvernehmen mit dem damaligen Leiter des Sächsischen Ministeriums für Volksbildung die medizinische Fakultät, der damals der Angeschuldigte schon angehörte, für die künftige Besetzung des Lehrstuhles durch den Ohrenarzt Dr. Knick ausgesprochen. Dadurch wurde Prof. Knick veranlaßt, einen Ruf nach Frankfurt/Main ausszuschlagen.

In der Zwischenzeit war jedoch der Gauleiter aus sachlichen Gründen zu der Überzeugung gekommen, dass Prof. Knick für diesen Lehrstuhl nicht mehr in Frage komme. Seine Ablehnung hatte er dem Dekan - dem Zeugen Hochrein - mitgeteilt, während der Angeschuldigte amtlich als Gaudosentenführer nicht unterrichtet worden war. Er erfuhr die Meinung des Gauleiters erst durch private Unterhaltungen mit dem Dekan.

Trotzdem und trotz nochmaligen Hinweisen seitens des Dekans auf zu erwartende Schwierigkeiten setzte sich der Angeschuldigte in zwei Sitzungen der medizinischen Fakultät im Juli 1942, an denen er als Fakultätsmitglied teilnahm, energisch dafür ein, dass Prof. Knick auf die Vorschlagsliste an erste Stelle gesetzt würde, deren Aufstellung Zweck der Sitzungen war. Er machte sich dabei zum Fortführer der Mehrheit der Fakultät, die sich ebenfalls Überwiegend für die Aufstellung Knicks aussprach, weil sie sich an den Beschluss aus dem Jahre 1936 gebunden fühlte. Es kam daraufhin zu einer erregten Auseinandersetzung zwischen dem Angeschuldigten und dem Dekan Prof. Hochrein, der eindringlich auf die Entscheidung des Gauleiters hinwies.

Auf Grund dieses Sachverhalts hat das Gaugericht ein disziplineloses und parteischädigendes Verhalten des Angeschuldigten fest-

gestellt. Dem Angeeschuldigten sei bekannt gewesen, dass der Gau-  
leiter sich gegen eine Berufung des Prof. Knick entschieden hätte,  
wobei es gleichgültig sei, ob er diese Kenntnis aus Privatge-  
sprächen oder amtlich erfahren hätte. Er hätte deshalb als Gau-  
amtsleiter keinesfalls sich für dessen Berufung einsetzen dürfen,  
erst recht nicht in einem Kreise, dem auch Nichtparteiengenossen  
angehörten. Diesem habe er damit ein Schauspiel mangelnder Dis-  
ziplin gegeben, das dem Ansehen der Bewegung überaus abträglich  
gewesen sei. Wenn er sachlich und fachlich eine der Auffassung  
des Gauleiters gegensätzliche Meinung vertrat, so wäre es seine  
Pflicht als Gauamtsleiter gewesen, diese Ansicht vor einer öffent-  
lichen Stellungnahme zunächst dem Gauleiter vorzutragen und dessen  
Entscheidung herbeizuführen, die für ihn dann bindend gewesen  
wäre.

Als strafscharfend hat das Gaugericht dabei berücksichtigt, dass  
der Angeeschuldigte bereits Anfang 1942 in einem Falle Matthes von  
dem Regierungsdirektor Lohde darauf hingewiesen worden war, dass  
er als Gauamtsleiter keinesfalls eine der Meinung des Gauleiters  
entgegenstehende Ansicht vertreten dürfe, sondern in einem solchen  
Falle eine Entscheidung des Gauleiters herbeizuführen habe.  
Andererseits hat das Gaugericht zu Gunsten des Angeeschuldigten  
berücksichtigt, dass er sich tatsächlich in einem gewissen innerem  
Konflikt befunden haben mag, weil er sich als Fakultätsmitglied an  
den Beschlüsse aus dem Jahre 1936 gebunden fühlte und auch sachlich  
der Meinung sein konnte, Prof. Knick sei als alter Parteigenosse  
und Träger der Uniform eines Gauamtsleiters ehrenhalber politisch  
unbedenklich und fachlich geeignet. Mit Rücksicht hierauf sowie  
im Hinblick auf den Einsatz des Angeeschuldigten als Dozenten-  
bundführer seit 1936 hat das Gaugericht die Erteilung einer Ver-  
warnung als ausreichende und angemessene Sühne für das disziplin-  
widrige und parteischädigende Verhalten des Angeeschuldigten an-  
gesehen.

Diese Feststellungen sowie auch das festgesetzte Strafmaß geben an sich zu Beantsandungen keinen Anlass.

Der Angeschuldigte hat nunmehr in seiner Beschwerde zu seiner Entlastung vorgetragen, dass er sich in voller Übereinstimmung mit dem Reichsdozentenführer, Pg. Prof. Dr. W. Schultze befunden habe, als er die Nennung Knicks auf der Liste unterstützte. Nachdem er die Angelegenheit bereits früher mit dem Reichsdozentenführer eingehend besprochen hatte, habe er bei den Kommissions- bzw. Fakultätsitzungen als örtlicher Dozentenführer im Auftrage und nach Weisung des Reichsdozentenführers gehandelt.

Dieser vom Reichsdozentenführer in vollem Umfang bestätigte Einwand des Angeschuldigten ist ohne Frage geeignet, den Angeschuldigten über die vom Gaugericht bereits berücksichtigten Milderungsgründe hinaus noch weiter zu entlasten. Wenn der Angeschuldigte sich jedoch in den weiteren Ausführungen seiner Beschwerde darauf beruft, dass der Gauleiter ihm als Dozentenführer keine entgegengesetzten Anweisungen erteilt habe und er deshalb von sich aus keine Veranlassung gesehen habe, beim Gauleiter vorstellig zu werden, so kann das Oberste Parteigericht ihm hierin nicht folgen. Die gegen die Berufung des Prof. Knick gerichtete Entscheidung des Gauleiters war von dem Dekan Prof. Hochrein sowohl dem Angeschuldigten persönlich wie auch in den Fakultätsitzungen in einer Form bekannt gegeben worden, dass darüber gar kein Zweifel mehr bestehen konnte. Bei dieser Sachlage durfte der Angeschuldigte als Gauamtsleiter unter keinen Umständen gegen die Entscheidung des Gauleiters opponieren, insbesondere nicht in einem Kreise, dem auch Nichtparteiengenossen angehörten. Es war vielmehr seine unbedingte Pflicht, seine und des Reichsdozentenführers Ansicht dem Gauleiter vorzulegen, bzw. sich mit dem Reichsdozentenführer in Verbindung zu setzen, damit dieser sich mit dem Gauleiter ins Einvernehmen setzen konnte.

Dem Angeeschuldigten kann demnach keineswegs der Vorwurf diszi-  
plinlosen und parteischädigenden Verhaltens erspart werden.  
Innerhin musste das angeführte weitere Entlastungsmoment zu  
einer Milderung der Gaugerichtsentscheidung <sup>dahin</sup> führen, dass dem  
Angeschuldigten ein strenger Verweis erteilt wird.

Dr. Volkmann  
Vorsitzender

Lüsebrink  
Beisitzer

Kriele  
Beisitzer

Ausgefertigt  
München, den 18. Mai 1943

Der Leiter der Geschäftsstelle:

am 28 MAI 1943

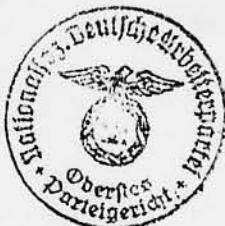

*W. Maier*  
(Maier)

- Verteiler:
- 1.) Prof. Dr. med. Max Clara, Einschr. gr. Rückschein!
  - 2.) Gaugericht Sachsen
  - 3.) Gauleitung Sachsen
  - 4.) Kreisleitung Leipzig
  - 5.) Reichsdezentralführer
  - 6.) Reichsschatzmeister

24. MAI 1943

Vollzogen am 15. 4. 43.  
durch den Leiter der Parteikanzlei  
Reichsleiter M. Bormann.

Bestätigt am 15. 4. 43.  
durch den Leiter der Parteikanzlei  
Reichsleiter M. Bormann.
